# Supplementary material for: Visual Quantitation of Copper Ions Based on a Microfluidic Particle Dam Reflecting the Cu(II)-Catalyzed Oxidative Damage of DNA
Source: MDPI journal article supplement (doi:10.3390/bios11120487), 2021-11-30
Supplement: s1 [file s1]

Supplementary Information

# Visual Quantitation of Copper Ions Based on a Microfluidic Particle Dam Reflecting the Cu(II)-catalyzed Oxidative Damage of DNA

Chenyu Cui and Ting-Hsuan Chen \*

Department of Biomedical Engineering, City University of Hong Kong, 83 Tat Chee Avenue, Hong Kong Special Administrative Region, China

\* Correspondence: thchen@cityu.edu.hk

**Table S1.** The sequence of oligonucleotides used in this work.

| Strand Name | Sequence                     |
|-------------|------------------------------|
| P1          | 5'-/biotin/ CCCCTATCACG-3'   |
| P2          | 5'-ATTAGCATTA-/biotin/-3'    |
| MB155       | 5'-TTAATGCTAATCGTGATAGGGG-3' |

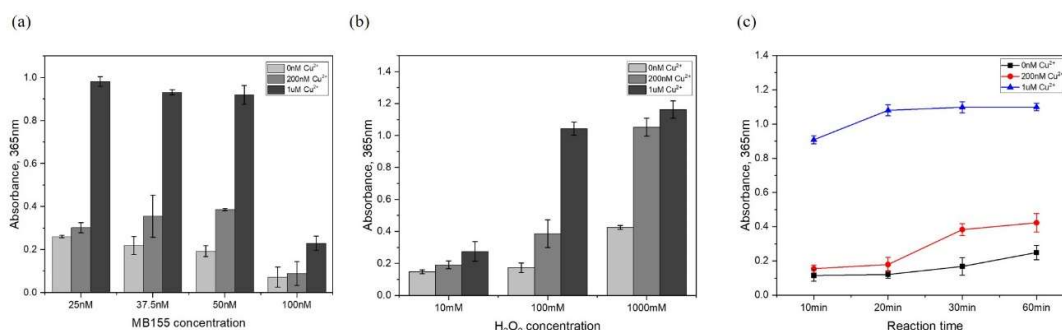

**Figure S1.** Optimization of (a) the MB155 concentration using 100 mM of H<sub>2</sub>O<sub>2</sub>, (b) the H<sub>2</sub>O<sub>2</sub> concentration using 50 nM of MB155, and (c) the reaction time for the magnetophoresis assay based on relative absorbance at 365 nm.

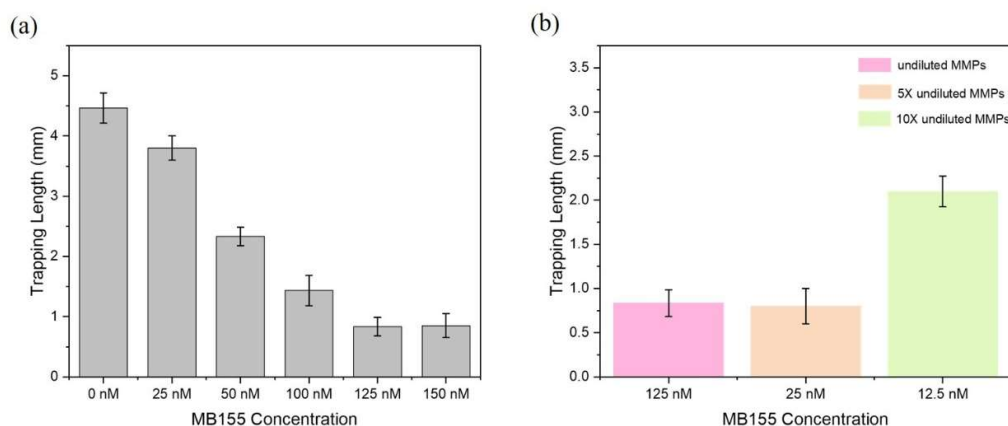

**Figure S2.** Optimization of the particle ratio for Cu<sup>2+</sup> on-chip detection. (a) Optimization of the MB155 concentration based on a 1:1 ratio (v:v) of MMPs and PMPs. (b) Optimization of the MMP concentration by diluting the MMPs while maintaining the same ratio of MMPs to MB155.

## Microfluidic Chip Fabrication

An SU-8 master (Gersteltec Sarl, Switzerland) with a  $25 \pm 0.3 \mu\text{m}$  thickness was fabricated by the photolithography process. Next, polydimethylsiloxane (PDMS; elastomer base/curing agent = 10:1, Sylgard<sup>TM</sup> 184, Dow Corning, USA) was poured onto the SU-8 master, followed by oven curing at  $70^\circ\text{C}$  for 2 h. Next, the PDMS was demolded and trimmed before 2 min of plasma treatment (Harrick Plasma, 400 mTorr) and coated with 3-Aminopropyl trimethoxysilane (Sigma Aldrich, USA) overnight in a vacuum chamber based on gas-phase deposition. A secondary PDMS casting was obtained using the first PDMS with a saline coating. Afterward, the secondary PDMS was peeled off and covered by NOA63, followed by a polypropylene film with a  $100 \mu\text{m}$  thickness (PP, KOKUYO, Japan). Subsequently, the NOA63 with a pattern was solidified after 50 s of UV exposure and peeling off of the secondary PDMS. Next, a glass slide was treated with a 10 wt% trichloro (1H, 1H, 2H, and 2H-perfluorooctyl) silane (97%) (J&K Scientific Ltd.) coating for 40 min in the vacuum chamber. The patterned NOA63 sheet and a glass slide were then treated with 2 min of plasma treatment (Harrick Plasma, 800 mTorr) for bonding. During the plasma treatment, the sample loading area of the glass slide was covered by a tape to avoid plasma treatment so that the sample loading area could remain hydrophobic in contrast to the hydrophilic microchannels. At last, a magnet (size:  $2.6 \times 1.8 \times 1.5 \text{ mm}$ ) was glued below the stomach-like structure of the microfluidic chip for magnetic separation.

### Linear Regression Equation

Calculation of the calibration curve was carried out using the linear regression model of  $y = b_0 + b_1x$ . The variables to achieve this calculation are outlined in the equations below.

$$\bar{x} = \sum_{i=1}^n \frac{x_i}{n} \quad \text{Equation (1)}$$

$$\bar{y} = \sum_{i=1}^n \frac{y_i}{n} \quad \text{Equation (2)}$$

$$b_0 = \bar{y} - b_1\bar{x} \quad \text{Equation (3)}$$

$$b_1 = \frac{\sum_{i=1}^n (x_i - \bar{x})y_i}{\sum_{i=1}^n (x_i - \bar{x})^2} \quad \text{Equation (4)}$$

$$s_{y/x}^2 = \frac{\sum_{i=1}^n (y_i - \hat{y}_i)^2}{n-2} \quad \text{Equation (5)}$$

$$s_{b_0}^2 = s_{y/x}^2 \left( \frac{1}{n} + \frac{\bar{x}^2}{\sum_{i=1}^n (x_i - \bar{x})^2} \right) \quad \text{Equation (6)}$$

$$s_{b_1}^2 = \frac{s_{y/x}^2}{\sum_{i=1}^n (x_i - \bar{x})^2} \quad \text{Equation (7)}$$

where  $\bar{x}$  and  $\bar{y}$  are the average values of  $x$  and  $y$ , respectively;  $b_0$  is the intercept;  $b_1$  is the slope; and  $s_{y/x}^2$ ,  $s_{b_0}^2$ , and  $s_{b_1}^2$  are the variances of the  $y$  values, intercept  $b_0$ , and slope  $b_1$ . Meanwhile,  $n$  is the total measurement number, derived from  $n = \sum_{j=1}^k m_j$ , where  $j$  is the concentration level,  $k$  is the number of  $j$ , and  $m_j$  is the repeated testing times for every concentration level;  $\hat{y}_i$  is the estimated  $y$  value for a specific concentration  $x_i$  obtained from  $\hat{y}_i = b_0 + b_1 x_i$ . Hence, we can achieve the final equation which describes the calibration curve as shown below.

$$\bar{y}_m^{\pm} = b_0 + b_1 x \pm t_{(1-\alpha/2, n-2)} s_{y/x} \left( \frac{1}{m} + \frac{1}{n} + \frac{(x - \bar{x})^2}{\sum_{i=1}^n (x_i - \bar{x})^2} \right)^{1/2} \quad \text{Equation (8)}$$

where  $1-\alpha/2$  is the confidence interval of two-tailed hypothesis tests,  $t_{(1-\alpha/2, n-2)}$  is the critical value of the Student's  $t$  distribution, and  $1/m$  is the contribution of the uncertainty from the average of  $m$  replicates in future observations [1,2].

### Limit of Detection

For the limit of detection calculation, it was obtained by the above calibration function and expressed as:

$$x_D = \delta_{(\alpha, \beta, n-2)} \frac{s_{y/x}}{b_1} \left( 1 + \frac{1}{n} + \frac{\bar{x}^2}{\sum_{i=1}^n (x_i - \bar{x})^2} \right)^{1/2} \quad \text{Equation (9)}$$

where  $\delta_{(\alpha, \beta, n-2)}$  is the non-centrality parameter protecting against type I and II errors (less than 5% of the positive or negative false rate) [2].

### Inverse Regression

After observing the average trapping length on the chip, the estimated concentration of  $\text{Cu}^{2+}$  in tap water can be calculated by  $\hat{x}_0 = (\bar{y}_{0m} - b_0) / b_1$ , where  $\bar{y}_{0m}$  is the average measurement value after repeated experiments. Thus, the

variance of  $\hat{x}_0$  is expressed as  $s_{x_0}^2 = \frac{s_{y/x}^2}{b_1^2} \left( \frac{1}{m} + \frac{1}{n} + \frac{(\hat{x}_0 - \bar{x})^2}{\sum_{i=1}^n (x_i - \bar{x})^2} \right)$ , where  $m$  represents the times of the repeated

measurements.

Next, the inverse regression was obtained based on above calculation equation, which is shown as:

$$\hat{x}_0^{\pm} = \hat{x}_0 \pm t_{(1-\alpha/2, n-2)} s_{x_0} \quad \text{Equation (10)}$$

where  $t_{(1-\alpha/2, n-2)} s_{x_0}$  is the estimated error and  $t = 1.645$  for 90% of the confidence interval of two-tailed hypotheses [2].

### References

1. Clayton, C.A.; Hines, J.W.; Elkins, P.D. Detection limits with specified assurance probabilities. *Anal. Chem.* **1987**, *59*, 2506–2514, doi:10.1021/ac00147a014.
2. Lavagnini, I.; Magno, F. A statistical overview on univariate calibration, inverse regression, and detection limits: Application to gas chromatography/mass spectrometry technique. *Mass Spectrom. Rev.* **2007**, *26*, 1–18, doi:10.1002/mas.20100.
